# Supplementary material
Source: PubMed Central journal article supplement (PMC6338505)
Supplement: NIHMS1510824-supplement-2.pdf [file NIHMS1510824-supplement-2.pdf]

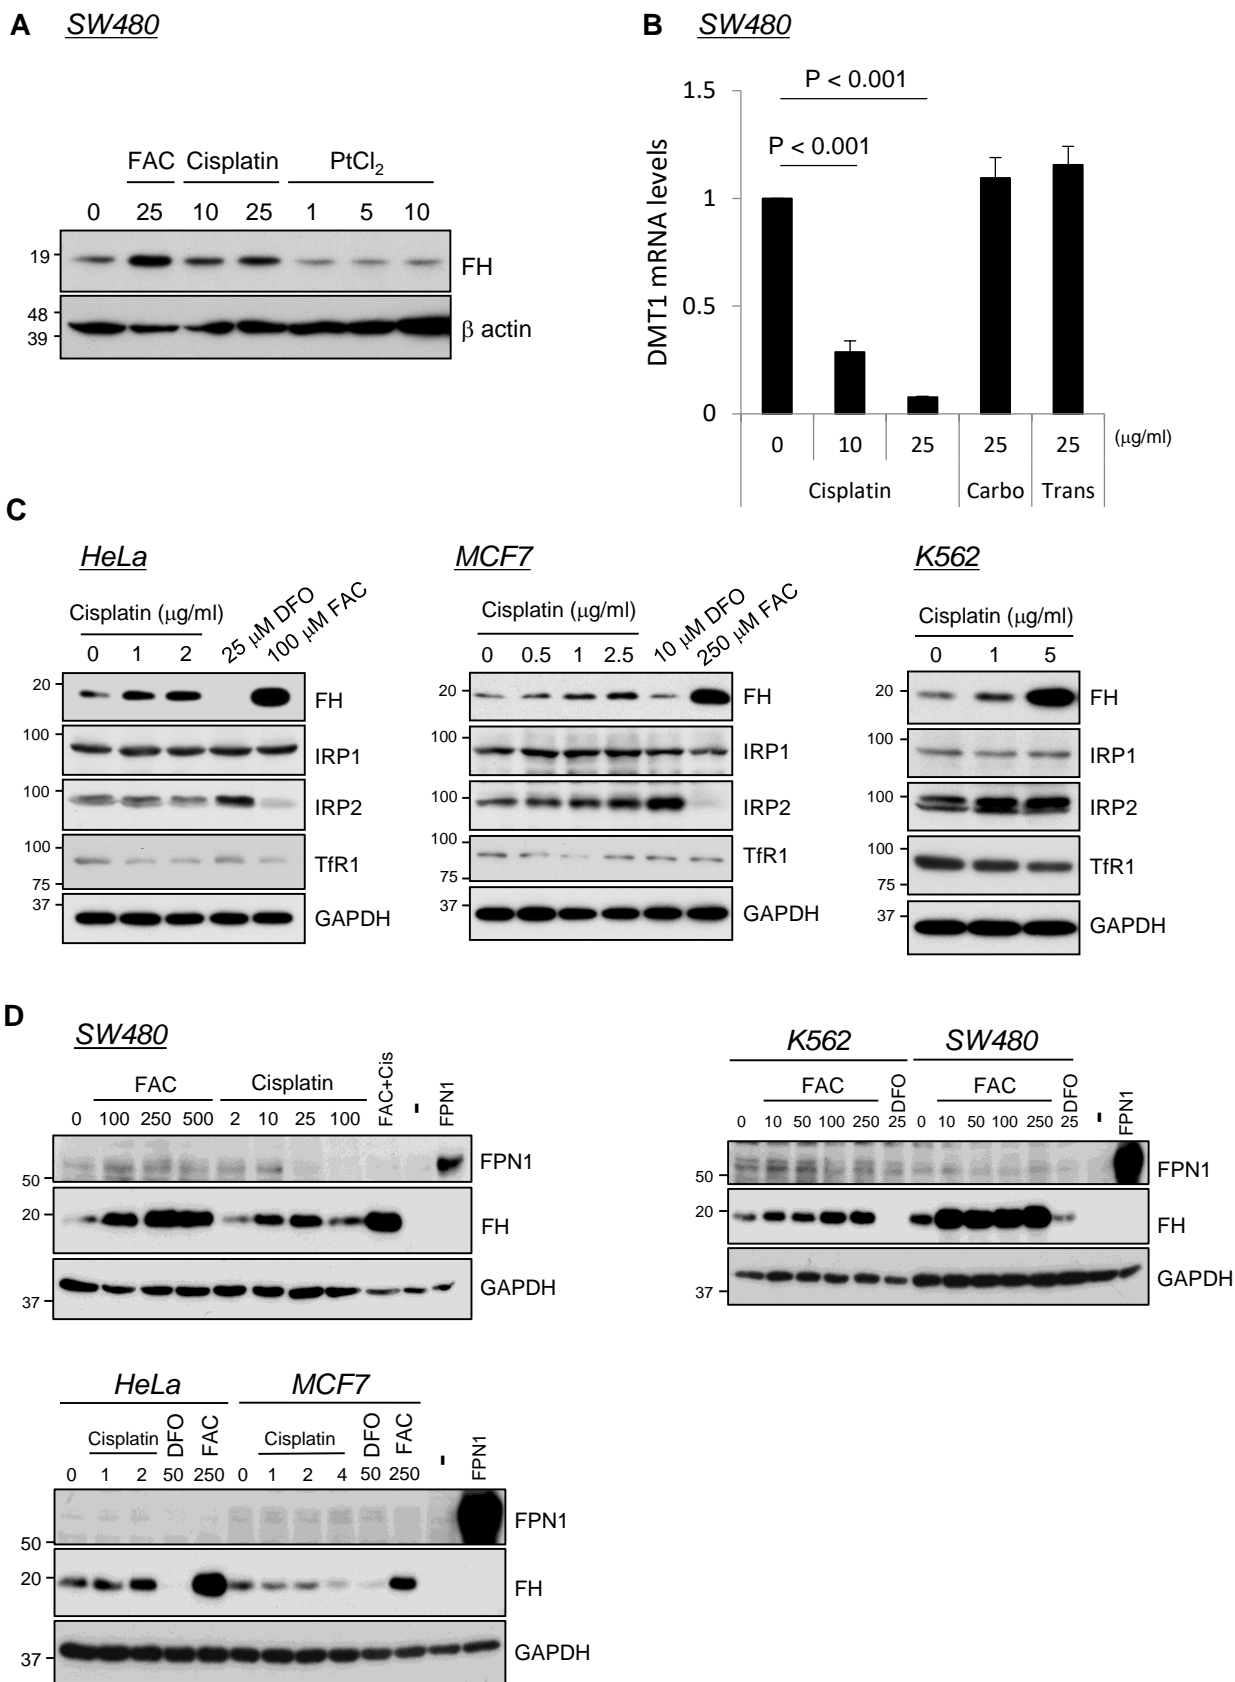

**Figure S1. Related to Figure 1**

*M. Miyazawa et al.*

## Legend

# Figure S1. Related to Figure 1

**A)** SW480 cells were treated with ferric ammonium citrate (FAC,  $\mu\text{M}$ ), cisplatin or  $\text{PtCl}_2$  ( $\mu\text{g}/\text{mL}$ ) at the indicated concentrations for 24 h. Ferritin H (FH) protein expression was measured by Western blotting using whole cell lysates.  $\beta$  actin was used as a protein loading control. **B)** SW480 cells were treated with cisplatin, carboplatin (Carbo), or transplatin (Trans) for 24 h. DMT1 mRNA expression was measured by qPCR, normalized by GAPDH mRNA. Means  $\pm$  SD are shown ( $n = 3$ ). **C)** HeLa, MCF7, and K562 cells were treated with cisplatin, DFO, or FAC at the indicated concentrations for 24 h (HeLa and K562) or 44 h (MCF7), and ferritin H (FH), IRP1, IRP2, TfR1 and GAPDH protein levels were measured by Western blotting using whole cell lysates. **D)** (top left) SW480 cells were treated with FAC, cisplatin, or FAC (250  $\mu\text{M}$ ) plus cisplatin (10  $\mu\text{g}/\text{ml}$ ) for 18 h. Expression of ferroportin (FPN1), FH and GAPDH was measured by Western blotting using whole cell lysates. K562 and SW480 (top right) or HeLa and MCF7 cells (bottom) were treated with cisplatin ( $\mu\text{g}/\text{ml}$ ), FAC ( $\mu\text{M}$ ), or DFO ( $\mu\text{M}$ ) at the indicated concentrations for 24 h and expression of FPN1, FH, and GAPDH was measured by Western blotting using whole cell lysates. Whole cell lysates from HEK293 cells transfected with pCMV empty vector (-) and pCMVferroportin1 (FPN1) were loaded together as controls of FPN1 Western blotting.

HepG2

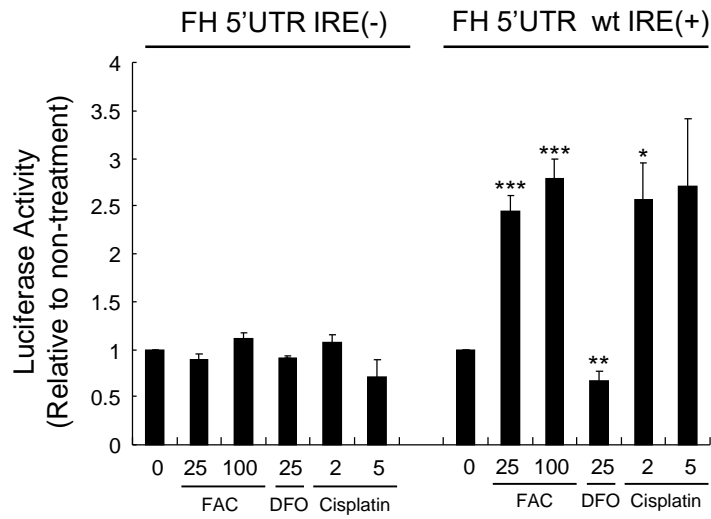

**Figure S2. Related to Figure 1**

*M. Miyazawa et al.*

Legend

## Figure S2. Related to Figure 1

Plasmid containing 5'-human ferritin H UTR with IRE [FH 5' UTR IRE(+)] or without IRE [FH 5'UTR IRE(-)] fused to firefly luciferase was transfected into HepG2 cells. The day after transfection, cells were treated with 0, 25, 100  $\mu$ M FAC, 25  $\mu$ M DFO, or 2, 5  $\mu$ g/mL cisplatin for 12-17 h, and luciferase expression was measured. Means  $\pm$  SD are shown (n = 3-6). \*  $P < 0.05$ , \*\*  $P < 0.01$ , \*\*\*  $P < 0.001$  vs. untreated cells.

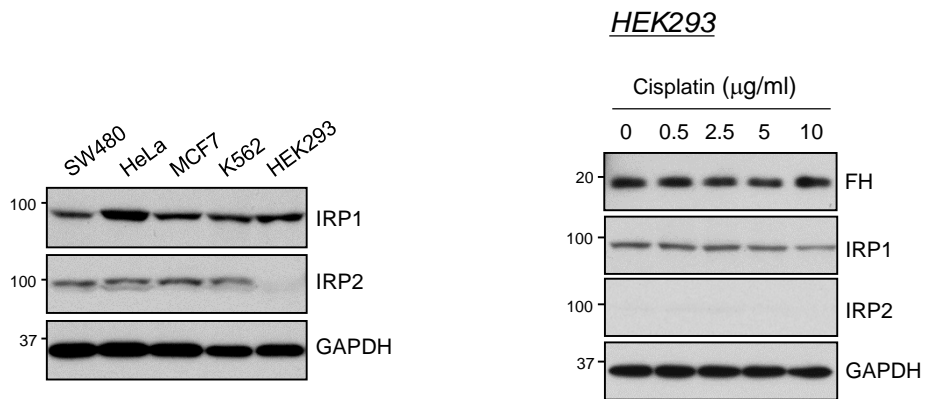

**Figure S3. Related to Figure 2**

*M. Miyazawa et al.*

## Figure S3. Related to Figure 2

Whole cell lysates prepared from untreated SW480, HeLa, MCF7, K562, or HEK293 cells were used for IRP1, IRP2, and GAPDH Western blots (left). HEK293 cells were treated with cisplatin at the indicated concentrations for 24 h and whole cell lysates were subjected to Western blots for ferritin H (FH), IRP1, IRP2 and GAPDH (right).

A

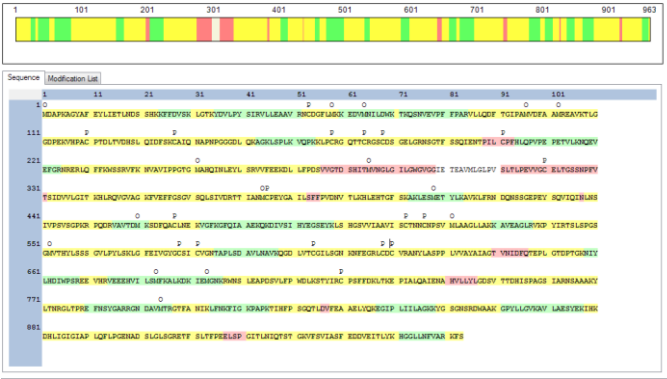

B

Fragment Mass Spectrum (Sequence:LSHGVSVIAAVISCTNNCP)

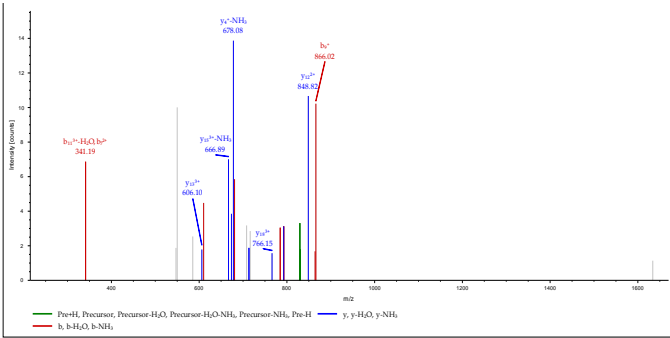

C

| #1 | b-H <sub>2</sub> O* | b-H <sub>2</sub> O* | b-H <sub>2</sub> O* | b-NH <sub>3</sub> * | b-NH <sub>3</sub> * | b-NH <sub>3</sub> * | Seq. | y-H <sub>2</sub> O* | y-H <sub>2</sub> O* | y-H <sub>2</sub> O* | y-NH <sub>3</sub> * | y-NH <sub>3</sub> * | y-NH <sub>3</sub> * | #2        |   |
|----|---------------------|---------------------|---------------------|---------------------|---------------------|---------------------|------|---------------------|---------------------|---------------------|---------------------|---------------------|---------------------|-----------|---|
| 11 |                     |                     |                     |                     |                     |                     | L    |                     |                     |                     |                     |                     |                     | 20        |   |
| 2  | 183.11281           | 92.06004            | 61.70912            |                     |                     |                     | S    | 2359.9310           | 1180.46914          | 787.31519           | 2360.91502          | 1180.96115          | 787.64319           | 19        |   |
| 3  | 320.17172           | 180.88907           | 107.39543           |                     |                     |                     | H    | 2272.89898          | 1136.95313          | 768.30453           | 2273.86299          | 1137.44513          | 758.63252           | 18        |   |
| 4  | 377.19318           | 189.10023           | 126.40258           |                     |                     |                     | G    | 2135.84007          | 1068.42367          | 712.81821           | 2136.80408          | 1068.91568          | 712.94721           | 17        |   |
| 5  | 464.22522           | 232.81622           | 155.41328           |                     |                     |                     | S    | 2078.81860          | 1039.91294          | 693.61109           | 2079.80235          | 1040.40489          | 693.93906           | 16        |   |
| 6  | 563.29564           | 282.15048           | 188.43607           |                     |                     |                     | V    | 1891.78657          | 996.39662           | 664.60037           | 1892.77016          | 996.88893           | 664.92038           | 15        |   |
| 7  | 662.36204           | 331.68467           | 221.45887           |                     |                     |                     | V    | 1892.71812          | 946.86227           | 631.57575           | 1893.70216          | 947.35472           | 631.90557           | 14        |   |
| 8  | 775.44613           | 388.22674           | 258.15329           |                     |                     |                     | I    | 1793.64972          | 897.32850           | 598.35474           | 1794.63374          | 897.82525           | 598.82717           | 13        |   |
| 9  | 846.48322           | 423.74524           | 282.83285           |                     |                     |                     | A    | 1690.69594          | 850.78644           | 560.86207           | 1691.67996          | 851.27847           | 561.18832           | 12        |   |
| 10 | 917.52037           | 459.26323           | 306.51164           |                     |                     |                     | A    | 1609.62865          | 805.26791           | 537.11613           | 1610.61255          | 805.75991           | 537.52004           | 11        |   |
| 11 | 1016.58872          | 528.72802           | 339.53445           |                     |                     |                     | V    | 1538.49142          | 768.74938           | 513.59198           | 1539.47544          | 770.24133           | 513.83003           | 10        |   |
| 12 | 1129.67286          | 585.34007           | 377.22914           |                     |                     |                     | I    | 1439.42304          | 720.21514           | 480.47918           | 1440.40703          | 720.70174           | 480.80718           | 9         |   |
| 13 | 1216.70483          | 638.85933           | 408.23982           |                     |                     |                     | S    | 1326.33881          | 663.67310           | 442.78448           | 1327.32224          | 664.16511           | 443.11263           | 8         |   |
| 14 | 1565.74204          | 783.37388           | 522.59488           |                     |                     |                     | C-PT | 1239.39689          | 620.15703           | 413.77383           | 1240.29093          | 620.64893           | 414.10182           | 7         |   |
| 15 | 1668.76674          | 833.89752           | 556.29744           |                     |                     |                     | T    | 890.27117           | 445.63943           | 287.49879           | 891.25572           | 446.13152           | 287.75676           | 6         |   |
| 16 | 1780.83068          | 890.91884           | 594.28172           |                     |                     |                     | N    |                     |                     |                     | 790.20894           | 395.67066           | 284.07420           | 5         |   |
| 17 | 1894.87833          | 947.94042           | 632.29620           |                     |                     |                     | A    |                     |                     |                     |                     | 676.16611           | 338.58919           | 228.65989 | 4 |
| 18 | 2243.90881          | 1122.45804          | 748.64112           |                     |                     |                     | C-PT |                     |                     |                     |                     | 562.12218           | 281.56477           | 188.04568 | 3 |
| 19 | 2357.95174          | 1179.47951          | 786.65554           |                     |                     |                     | N    |                     |                     |                     |                     | 213.06899           | 107.04713           | 71.70052  | 2 |
| 20 |                     |                     |                     |                     |                     |                     | P    |                     |                     |                     |                     |                     |                     | 1         |   |

D

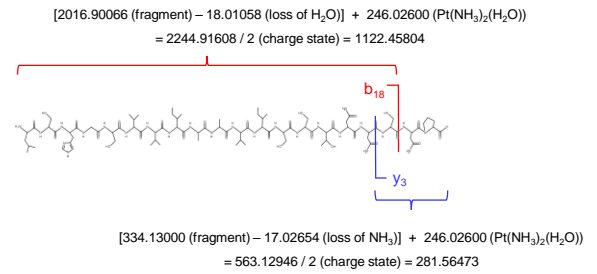

E

Mathematical Representation of the Addition of Pt(NH<sub>3</sub>)<sub>2</sub>(H<sub>2</sub>O) to C<sup>516</sup>

Ion Series Table

| #1 | b*         | b**        | b**       | Seq. | y*         | y**        | y**       | #2 |
|----|------------|------------|-----------|------|------------|------------|-----------|----|
| 1  | 114.09135  | 57.54931   | 38.70197  | L    |            |            |           | 20 |
| 2  | 201.12338  | 101.06533  | 67.71264  | S    | 2377.94157 | 1189.47442 | 793.31871 | 19 |
| 3  | 338.18229  | 169.59476  | 113.39895 | H    | 2290.90954 | 1145.95841 | 764.30803 | 18 |
| 4  | 395.20376  | 198.10552  | 132.40610 | G    | 2153.85063 | 1077.42895 | 718.62173 | 17 |
| 5  | 482.23579  | 241.62153  | 161.41678 | S    | 2096.82916 | 1048.91822 | 699.61457 | 16 |
| 6  | 581.30421  | 291.15574  | 194.43959 | V    | 2009.79713 | 1005.40220 | 670.60389 | 15 |
| 7  | 680.37263  | 340.68995  | 227.46239 | V    | 1910.72871 | 955.86799  | 637.58109 | 14 |
| 8  | 793.45670  | 397.23199  | 265.15708 | I    | 1811.66029 | 906.33378  | 604.55828 | 13 |
| 9  | 864.49382  | 432.75055  | 288.83612 | A    | 1698.57622 | 849.79175  | 566.86359 | 12 |
| 10 | 935.53094  | 468.26911  | 312.51516 | A    | 1627.53910 | 814.27319  | 543.18455 | 11 |
| 11 | 1034.59936 | 517.80332  | 345.53787 | V    | 1556.50198 | 778.75463  | 519.50551 | 10 |
| 12 | 1147.68343 | 574.34353  | 383.23266 | I    | 1457.43356 | 729.22042  | 488.48270 | 9  |
| 13 | 1234.71545 | 617.86137  | 412.24334 | S    | 1344.34949 | 672.67838  | 448.78801 | 8  |
| 14 | 1583.75065 | 792.37896  | 528.58840 | C-PT | 1257.31746 | 629.16237  | 418.77734 | 7  |
| 15 | 1684.79833 | 842.90280  | 562.27096 | T    | 908.28227  | 454.64477  | 303.43227 | 6  |
| 16 | 1798.84126 | 899.92427  | 600.28527 | N    | 807.23459  | 404.12093  | 269.74971 | 5  |
| 17 | 1912.88419 | 956.94573  | 638.29958 | N    | 693.19166  | 347.09947  | 231.73540 | 4  |
| 18 | 2261.91938 | 1131.46333 | 754.64464 | C-PT | 579.14873  | 290.07800  | 193.72109 | 3  |
| 19 | 2375.96231 | 1188.48479 | 792.65895 | N    | 230.11354  | 115.56041  | 77.37603  | 2  |
| 20 |            |            |           | P    | 116.07061  | 58.53894   | 39.36172  | 1  |

| #1 | b*         | b**        | b**       | Seq. | y*         | y**        | y**       | #2 |
|----|------------|------------|-----------|------|------------|------------|-----------|----|
| 1  | 114.09135  | 57.54931   | 38.70197  | L    |            |            |           | 20 |
| 2  | 201.12338  | 101.06533  | 67.71264  | S    | 2377.94157 | 1189.47442 | 793.31871 | 19 |
| 3  | 338.18229  | 169.59476  | 113.39895 | H    | 2290.90954 | 1145.95841 | 764.30803 | 18 |
| 4  | 395.20376  | 198.10552  | 132.40610 | G    | 2153.85063 | 1077.42895 | 718.62173 | 17 |
| 5  | 482.23579  | 241.62153  | 161.41678 | S    | 2096.82916 | 1048.91822 | 699.61457 | 16 |
| 6  | 581.30421  | 291.15574  | 194.43959 | V    | 2009.79713 | 1005.40220 | 670.60389 | 15 |
| 7  | 680.37263  | 340.68995  | 227.46239 | V    | 1910.72871 | 955.86799  | 637.58109 | 14 |
| 8  | 793.45670  | 397.23199  | 265.15708 | I    | 1811.66029 | 906.33378  | 604.55828 | 13 |
| 9  | 864.49382  | 432.75055  | 288.83612 | A    | 1698.57622 | 849.79175  | 566.86359 | 12 |
| 10 | 935.53094  | 468.26911  | 312.51516 | A    | 1627.53910 | 814.27319  | 543.18455 | 11 |
| 11 | 1034.59936 | 517.80332  | 345.53787 | V    | 1556.50198 | 778.75463  | 519.50551 | 10 |
| 12 | 1147.68343 | 574.34353  | 383.23266 | I    | 1457.43356 | 729.22042  | 488.48270 | 9  |
| 13 | 1234.71545 | 617.86137  | 412.24334 | S    | 1344.34949 | 672.67838  | 448.78801 | 8  |
| 14 | 1583.75065 | 792.37896  | 528.58840 | C-PT | 1257.31746 | 629.16237  | 418.77734 | 7  |
| 15 | 1684.79833 | 842.90280  | 562.27096 | T    | 908.28227  | 454.64477  | 303.43227 | 6  |
| 16 | 1798.84126 | 899.92427  | 600.28527 | N    | 807.23459  | 404.12093  | 269.74971 | 5  |
| 17 | 1912.88419 | 956.94573  | 638.29958 | N    | 693.19166  | 347.09947  | 231.73540 | 4  |
| 18 | 2261.91938 | 1131.46333 | 754.64464 | C-PT | 579.14873  | 290.07800  | 193.72109 | 3  |
| 19 | 2375.96231 | 1188.48479 | 792.65895 | N    | 230.11354  | 115.56041  | 77.37603  | 2  |
| 20 |            |            |           | P    | 116.07061  | 58.53894   | 39.36172  | 1  |

Difference between amino b<sub>17</sub> and b<sub>18</sub>:

$$2261.91938 - 1912.88419 = 349.03519 \text{ (addition of C-PT)}$$

Difference between amino y<sub>2</sub> and y<sub>3</sub>:

$$579.14873 - 230.11354 = 349.03519 \text{ (addition of C-PT)}$$

Figure S4. Related to Figure 3

M. Miyazawa et al.

## Legend

# Figure S4. Related to Figure 3

**A)** The image view of IRP2 sequence coverage. Highlighted amino acid sequences are covered by LC-MS/MS analysis. Green, yellow, and red highlights are high, medium, and low confidence ID's, respectively. **B)** The fragment mass spectrum for the peptide L<sup>499</sup>-P<sup>518</sup> (LSHGSVVIAAVISCTNNCNP). The table indicates the mass of the b and y ions for the peptide. The colored numbers are the ions identified in the fragment mass spectrum (top), b ions in red and y ions in blue. **C)** The table shows the mass with a loss of water or ammonia of the b and y ions for the peptide L<sup>499</sup>-P<sup>518</sup> (LSHGSVVIAAVISCTNNCNP). The colored numbers are ions identified on the spectrum. **D)** Platination of Cys516 was manually confirmed by the calculation based on  $b_{18}-H_2O^{2+}$  or  $y_3-NH_3^{2+}$  ion. **E)** Mathematical representation of the addition of  $Pt(NH_3)_2(H_2O)$  to Cys516. The ion series table shows the mass of b and y ions for the peptide L<sup>499</sup>-P<sup>518</sup> (LSHGSVVIAAVISCTNNCNP). The colored numbers are ions identified on the spectrum view. The red and blue numbers are b and y ions, respectively.



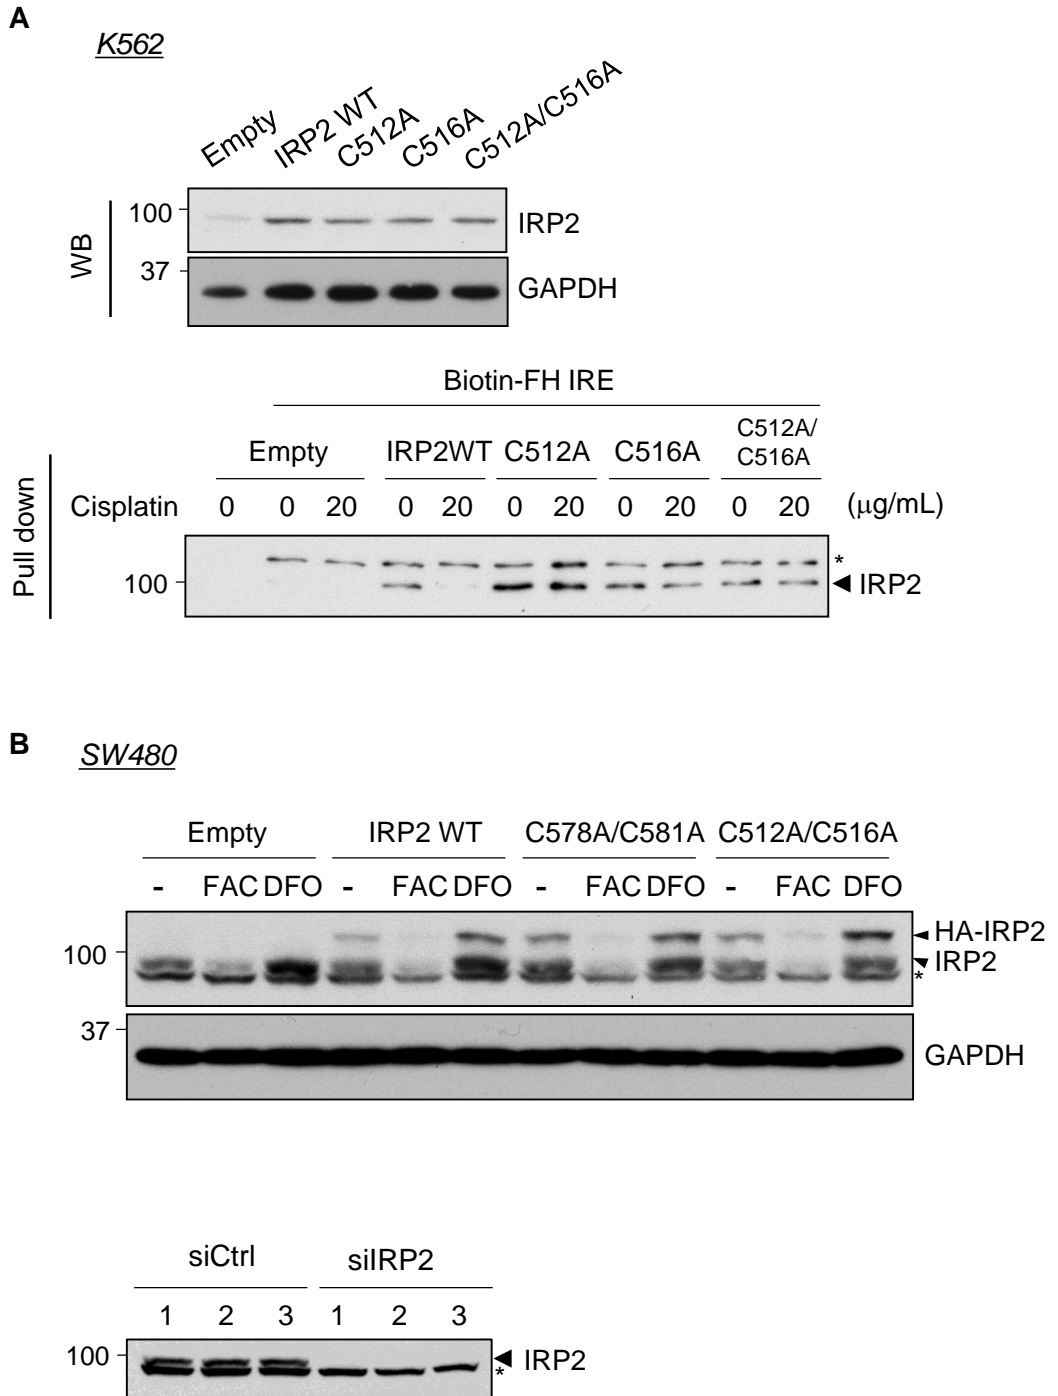

**Figure S5. Related to Figure 4**

*M. Miyazawa et al.*

## Legend

# Figure S5. Related to Figure 4

**A)** Non-tagged full length human IRP2 wt and Cys to Ala mutants (C512A, C516A, C512A/C516A) in pcDNA3.1 plasmids were transiently-transfected into K562 cells and IRP2 was detected by Western blotting with an IRP2 antibody (top). GAPDH was used as a loading control (WB). These cell lysates were incubated with 20  $\mu\text{g}/\text{mL}$  cisplatin and subjected to pull down assay using biotin-FH IRE probe (bottom). IRP2 binding ability to IRE was detected by Western blot with anti-IRP2 antibody (Pull down). \* indicates a non-specific band as we observed and verified in Fig. 2D. **B)** IRP2-transfected SW480 cells were treated with 250  $\mu\text{M}$  FAC or 100  $\mu\text{M}$  DFO for 21 h and Western blots were performed using IRP2 and GAPDH antibodies (top). Control (siCtrl) or IRP2 siRNA (siIRP2) was transfected into SW480 cells (triplicate) and IRP2 protein was measured by Western blotting. \* indicates a non-specific band as we also observed in Fig. 6F (bottom).

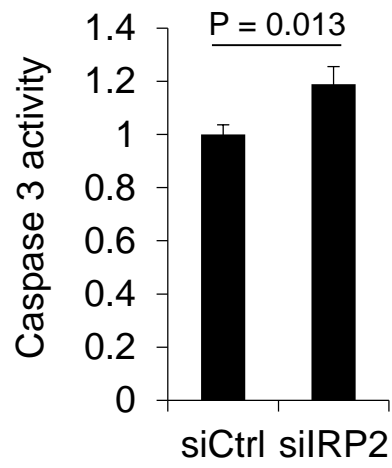

**Figure S6. Related to Figure 6**

*M. Miyazawa et al.*

Legend

## **Figure S6. Related to Figure 6**

siControl (siCtrl) or IRP2 siRNA (siIRP2) was transfected into SW480 cells for 48h, and caspase 3 activity was measured. Means  $\pm$  SD are shown (n = 3).

**Supplement Table 1, Related to STAR Methods**

| Primers for real time PCR |         |                                 |
|---------------------------|---------|---------------------------------|
| ferritin H                | Forward | 5'-ACTGATGAAGCTGCAGAACC-3'      |
|                           | Reverse | 5'-GTCACCCAATTCTTTGATGG-3'      |
| TfR1                      | Forward | 5'-ACCATTGTTCATATACCCGGTTCA-3'  |
|                           | Reverse | 5'-CAATAGCCCAAGTAGCCAATCAT-3'   |
| DMT1                      | Forward | 5'-GTGTTCTACTTGGGTTGGCAATGT-3'  |
|                           | Reverse | 5'-TTGGCTATGTTACACAGTAAACCAT-3' |
| GADD45b                   | Forward | 5'-TACGAGTCGGCCAAGTTGATG-3'     |
|                           | Reverse | 5'-GGATGAGCGTGAAGTGGATTT-3'     |
| p21                       | Forward | 5'-TGTCCGTCAGAACCCATGC-3'       |
|                           | Reverse | 5'-AAAGTCGAAGTTCCATCGCTC-3'     |
| DUSP1                     | Forward | 5'-GCCTTGCTTACCTTATGAGGAC-3'    |
|                           | Reverse | 5'-GGGAGAGATGATGCTTCGCC-3'      |
| GAPDH                     | Forward | 5'-GAGTCAACGGATTTGGTCGT-3'      |
|                           | Reverse | 5'-TTGATTTTGGAGGGATCTCG-3'      |
| B2M                       | Forward | 5'-TGCTGTCTCCATGTTTGATGTATCT-3' |
|                           | Reverse | 5'-TCTCTGCTCCCCACCTCTAAGT-3'    |

**Supplement Table 2, Related to STAR Methods**

| siRNA sequences |                      |           |                             |
|-----------------|----------------------|-----------|-----------------------------|
| IRP1 siRNA-1    | Qiagen, custom order | Sense     | 5'-CCAUAAGACCUUUAUCAUTT-3'  |
|                 |                      | Antisense | 5'-AUAGAUAAAGGUCUUAUGGTT-3' |
| IRP1 siRNA-2    | Qiagen, custom order | Sense     | 5'-GGGCAAGAACGAUACACUAUU-3' |
|                 |                      | Antisense | 5'-UAGUGUAUCGUUCUUGCCCUU-3' |
| IRP2 siRNA      | Qiagen, custom order | Sense     | 5'-GGAAGAACAUGUUUAUCUAUU-3' |
|                 |                      | Antisense | 5'-UAGUAUAACAUGUUCUCCUU-3'  |
| Control siRNA   | Qiagen, SI03650318   | Sense     | not available               |
|                 |                      | Antisense | not available               |

**Supplement Table 3, Related to STAR Methods**

| Primers for QuikChange II Site-Directed Mutagenesis |         |                                                        |
|-----------------------------------------------------|---------|--------------------------------------------------------|
| IRP2 C512A                                          | Forward | 5'-GGTCATTGCTGCAGTTATCAGTGCTACCAATAATTGCAATCC-3'       |
|                                                     | Reverse | 5'-GGATTGCAATTATTGGTAGCACTGATAACTGCAGCAATGACC-3'       |
| IRP2 C516A                                          | Forward | 5'-ACCAATAATGCCAATCCATCTGTCATGCTTGCTGCAGG-3'           |
|                                                     | Reverse | 5'-CCTGCAGCAAGCATGACAGATGGATTGGCATTATTGGT-3'           |
| IRP2 C578A/C581A                                    | Forward | 5'-GAAATCGTTGGCTATGGAGCTTCAACTGCTGTGGGAAATACAGCACCC-3' |
|                                                     | Reverse | 5'-GGGTGCTGTATTTCCACAGCAGTTGAAGCTCCATAGCCAACGATTC-3'   |
